# Supplementary material for: Th1‐type immune responses to Porphyromonas gingivalis antigens exacerbate angiotensin II‐dependent hypertension and vascular dysfunction
Source: PubMed Central journal article supplement (PMC6534780; doi:10.1111/bph.14536), 2018-12-26
Supplement: BPH-176-1922-s001.pdf [file BPH-176-1922-s001.pdf]

## List of hyperlinks

[Angiotensin II \(Ang II\)](#)

[CCL5](#)

[CCR5](#)

[IFN- \$\gamma\$](#)

[IL-12](#)

[IL-17](#)

[IL-4](#)

[TGF- \$\beta\$](#)

[TNF- \$\alpha\$](#)
